# Supplementary material for: In situ self-assembled biosupramolecular porphyrin nanofibers for enhancing photodynamic therapy in tumors
Source: Royal Society of Chemistry journal article supplement (doi:10.1039/c9nr10646d), 2020-01-01
Supplement: c9nr10646d1.pdf [file c9nr10646d1.pdf]

# Supporting Information

## In-Situ Self-Assembled Biosupramolecular Porphyrin Nanofibers for Enhancing Photodynamic Therapy in Tumor

Yang Liu,<sup>a</sup> Xiaomin Li,<sup>a</sup> Xiaoyan Niu,<sup>a</sup> Licheng Yu,<sup>a</sup> Weizhou Sha,<sup>a</sup> Wei Wang,<sup>a</sup> Zhi Yuan<sup>\*a, b</sup>

<sup>a</sup>Key Laboratory of Functional Polymer Materials of Ministry of Education, College of Chemistry, Nankai University, Tianjin 300071, China.

<sup>b</sup>Collaborative Innovation Center of Chemical Science and Engineering, Nankai University, Tianjin 300071, China.

\*Corresponding author

Prof. Zhi Yuan

E-mail: zhiy@nankai.edu.cn

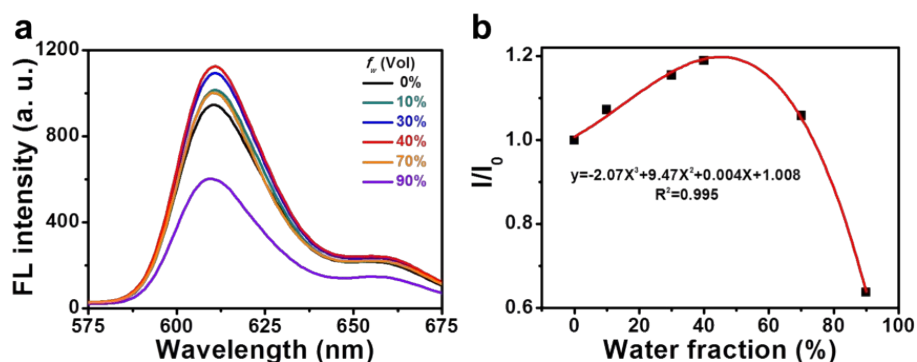

**Figure S1.** a) The fluorescence intensity of ZnP-OC (11  $\mu\text{g/mL}$ ) in THF-water mixtures with different water fractions at the same total volume. b) Plot of fluorescence peak intensity of ZnP-OC in THF/water mixture.  $I_0$  and  $I$  are the fluorescence peak intensities in pure THF and THF/water mixtures with specific water fraction, respectively.

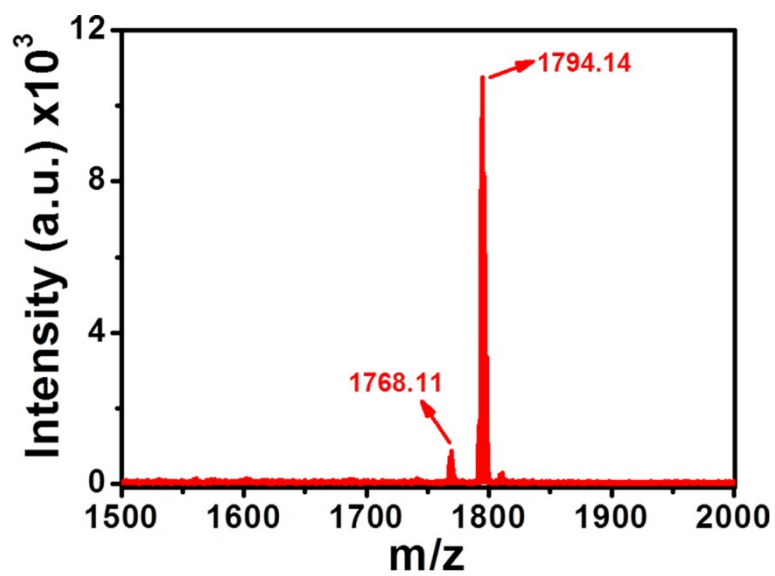

Figure S2. The Maldi-ToF MS spectrum of ZnP-OC.

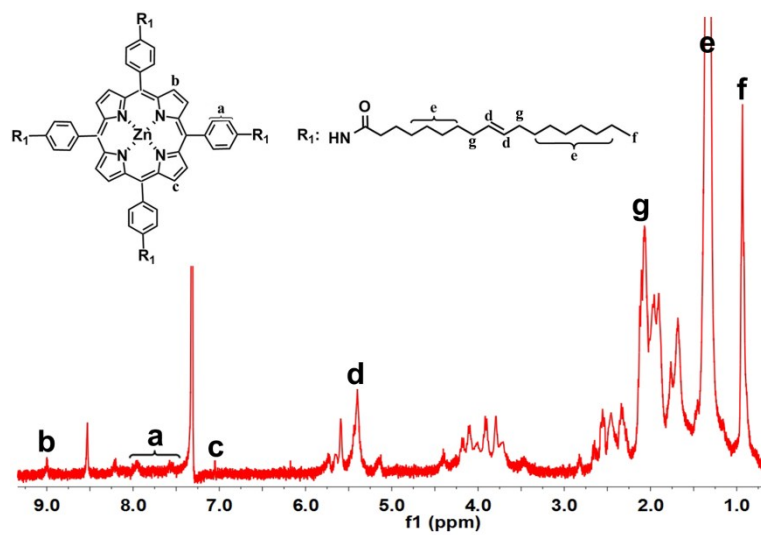

Figure S3. The <sup>1</sup>H-NMR (CHCl<sub>3</sub>) spectrum of ZnP-OC.

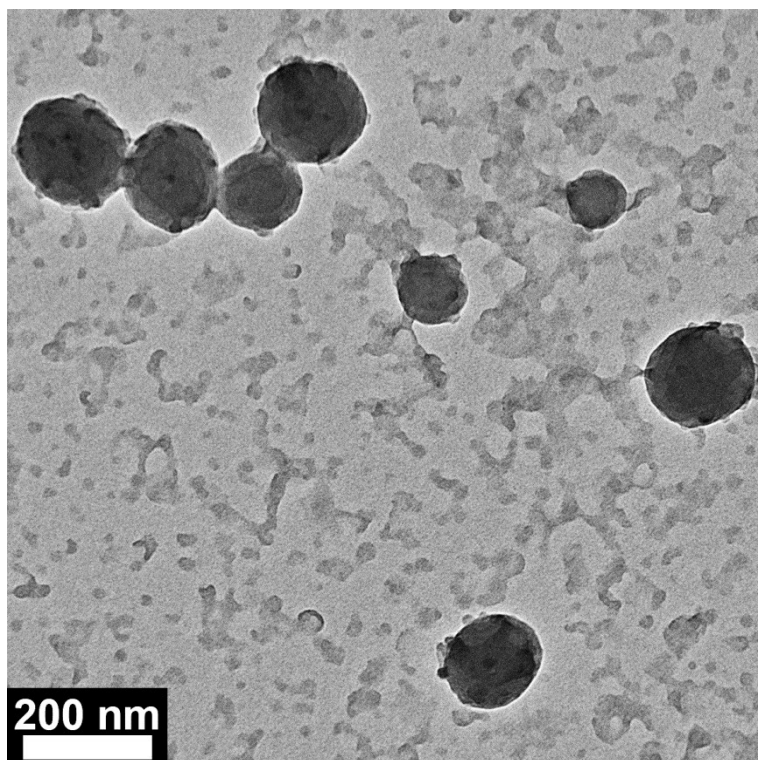

**Figure S4.** TEM image of Zn-TAPP.

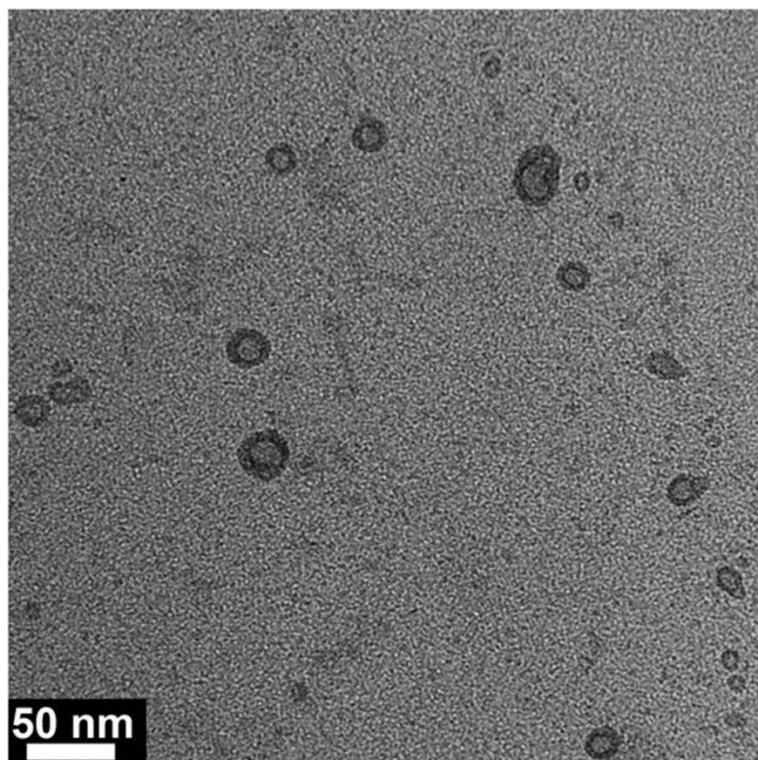

**Figure S5.** TEM image of ZnP-OC.

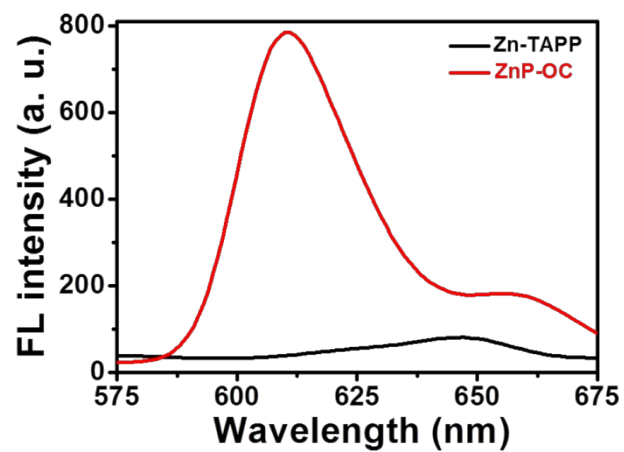

**Figure S6.** The fluorescence spectrum of Zn-TAPP and ZnP-OC with same concentration in THF/water (V/V= 20:80).

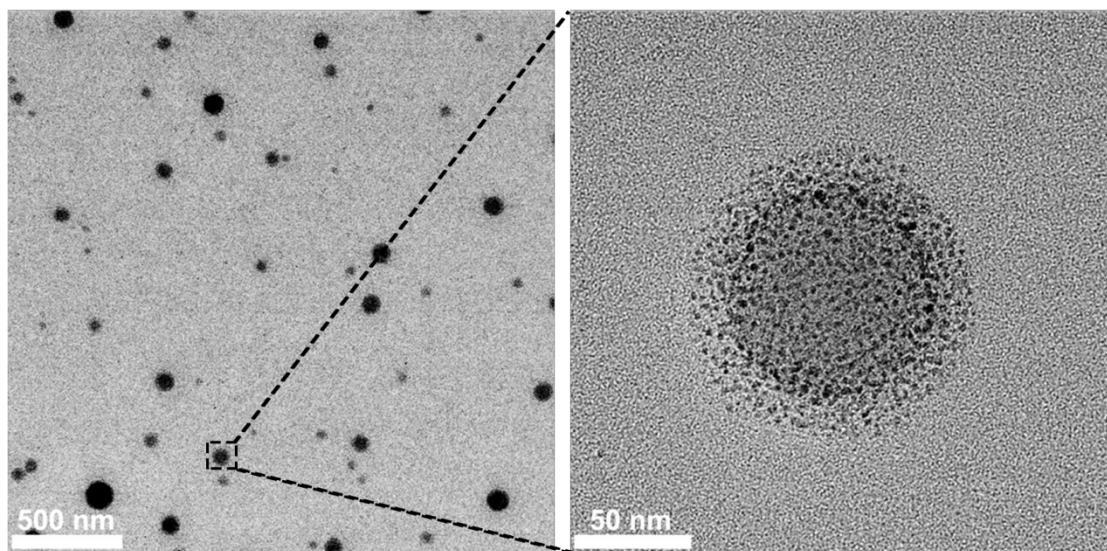

**Figure S7.** TEM image of ZnP-OC-M NPs.

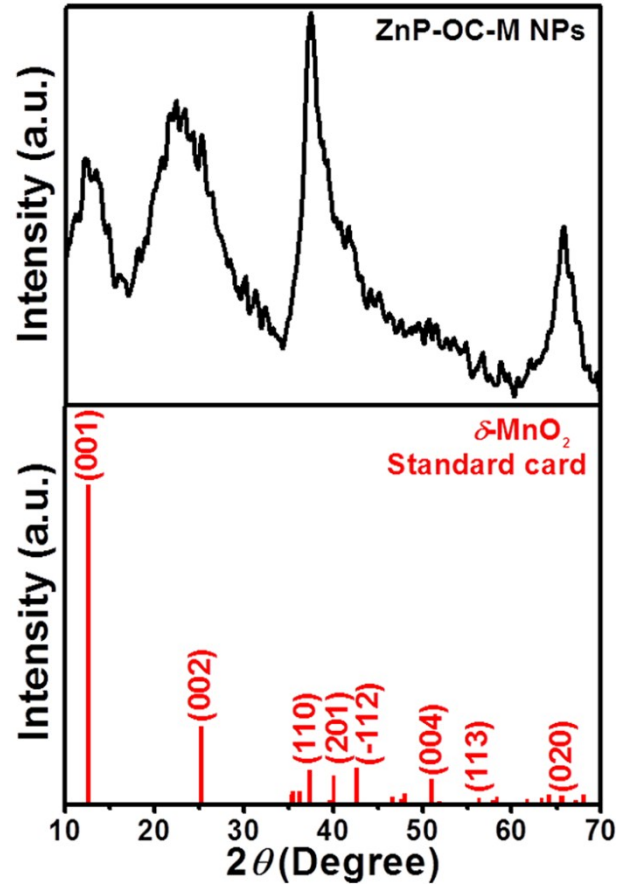

**Figure S8.** The XRD spectrum of ZnP-OC-M NPs and stander card of  $\delta$ -MnO<sub>2</sub>.

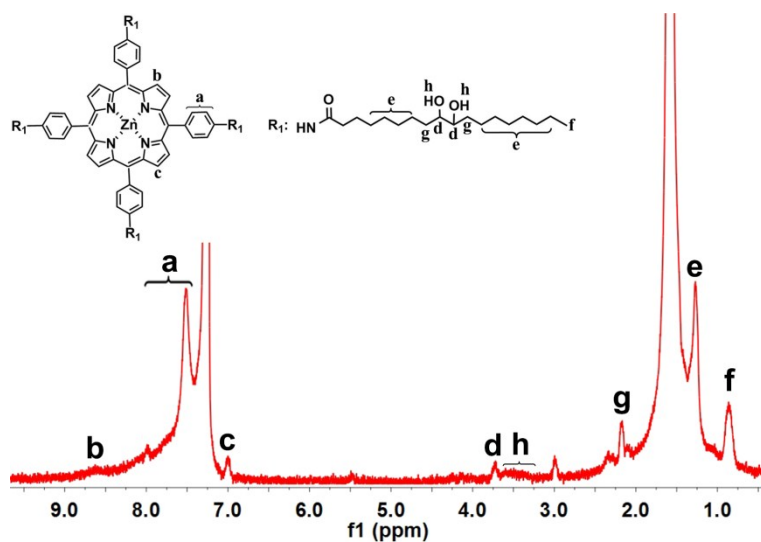

**Figure S9.** The  $^1\text{H-NMR}$  ( $\text{CDCl}_3$ ) spectrum of  $\text{ZnP-OC@diol}$  after the degradation of  $\text{ZnP-OC-M NPs}$ .

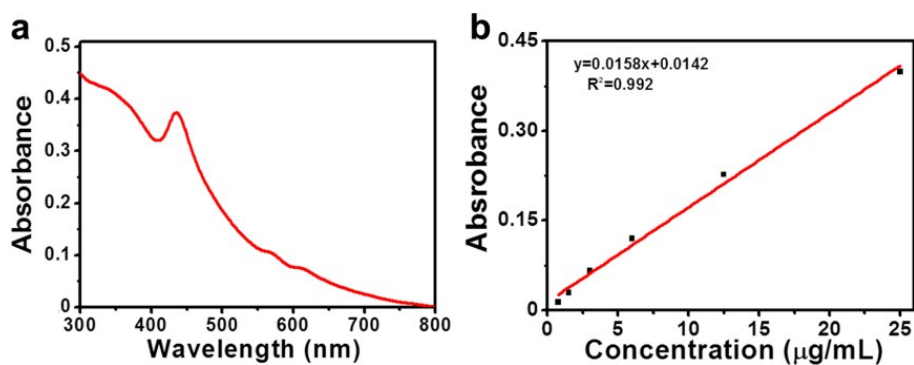

**Figure S10.** a) The UV-vis absorption spectrum of  $\text{ZnP-OC-M NPs}$  and b) the standard curve of  $\text{ZnP-OC}$ . The concentration of  $\text{ZnP-OC-M NPs}$  is  $0.1 \text{ mg/mL}$ .

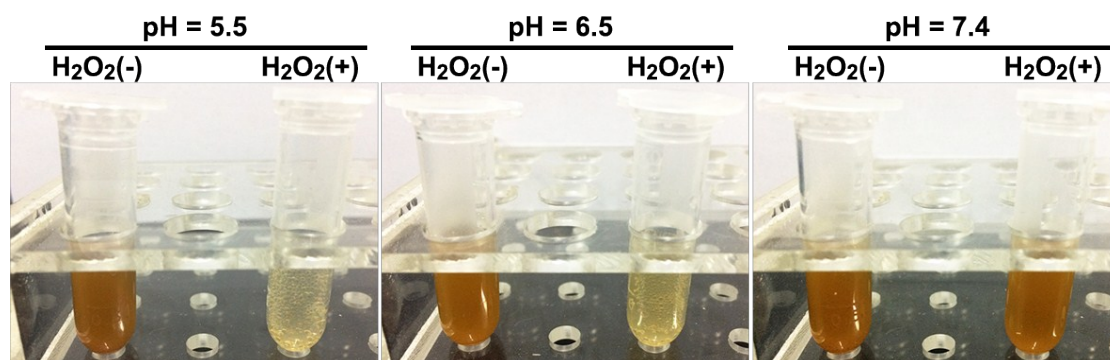

**Figure S11.** The photo images of ZnP-OC-M degradation under different conditions at 10 min.

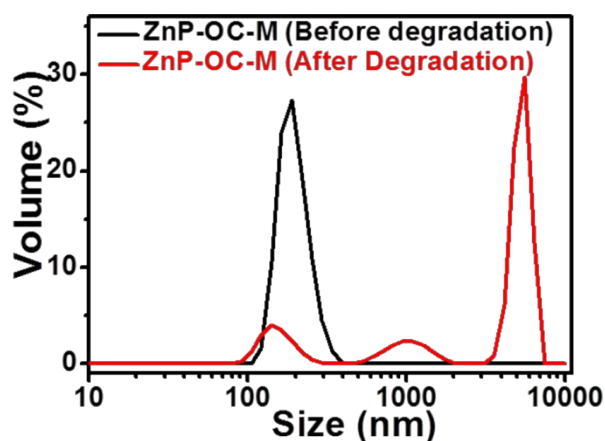

**Figure S12.** The hydrodynamic size of ZnP-OC-M NPs before and after degradation in H<sub>2</sub>O<sub>2</sub> solution (100  $\mu$ M, pH=5.5).

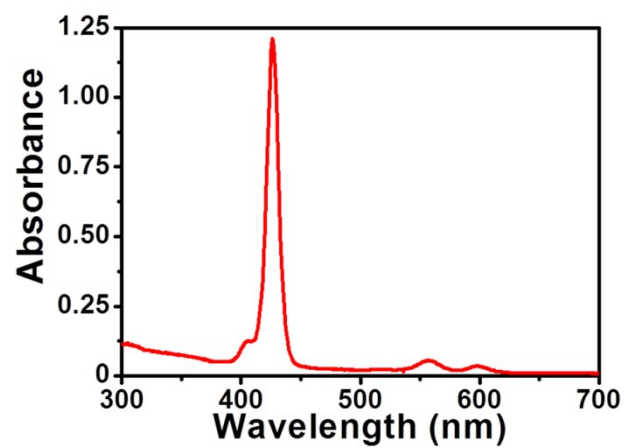

**Figure S13.** The Uv-vis spectrum of ZnP-OC in THF solution.

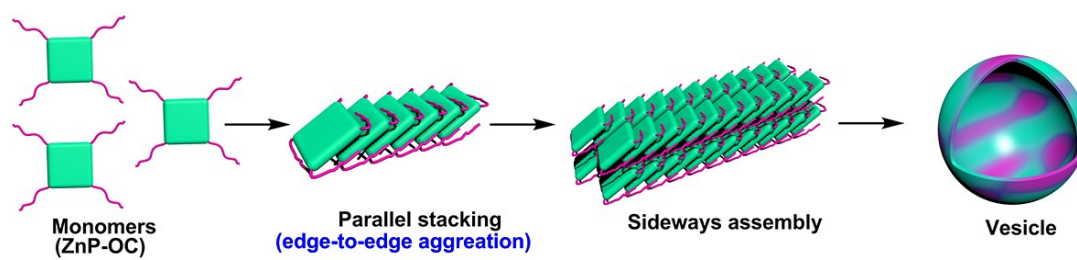

**Figure S14.** Schematic illustration of the formation process of vesicle.



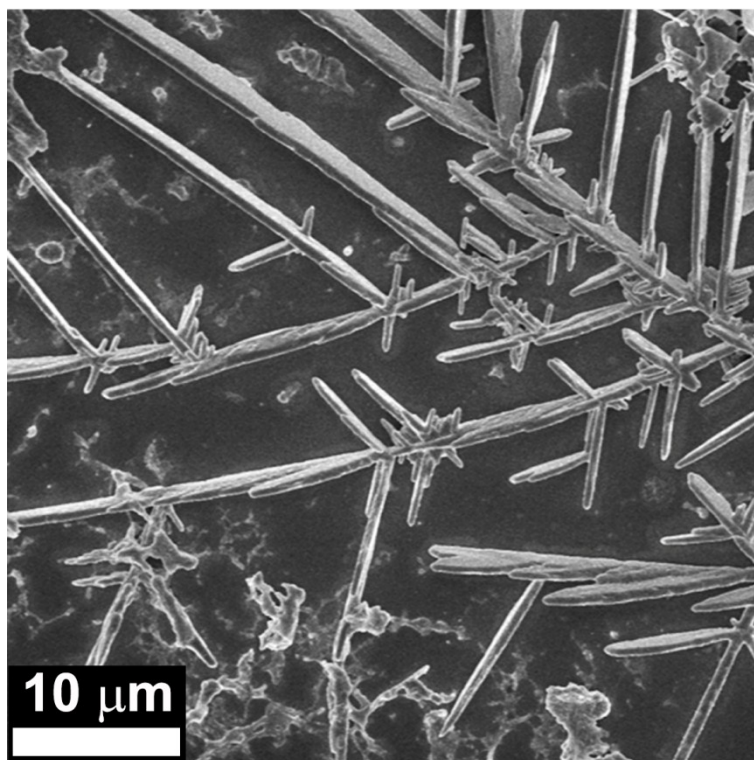

**Figure S15.** SEM image of ZnP-OC@diol that degraded from ZnP-OC-M NPs in H<sub>2</sub>O<sub>2</sub> solution (100 μM, pH=5.5) for 48 h.

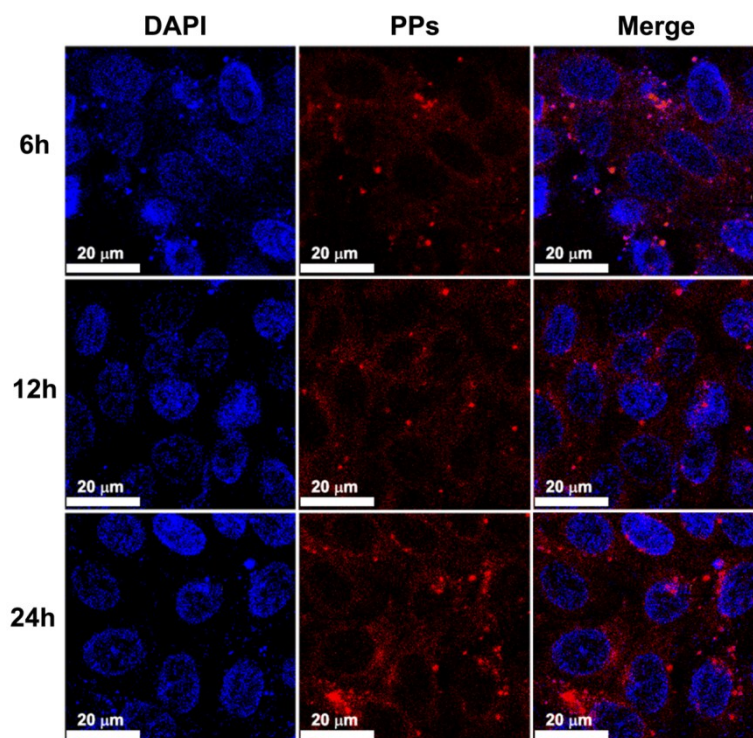

**Figure S16.** The HepG2 cells uptake of Zn-TAPP after co-incubated for different time.

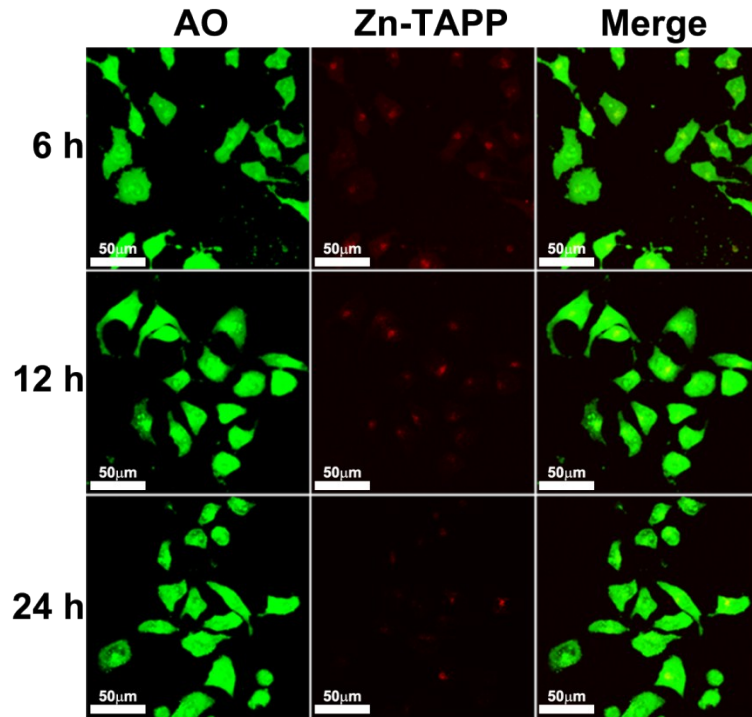

**Figure S17.** The cellular exocytosis of Zn-TAPP with different time after co-incubated with 24 h.

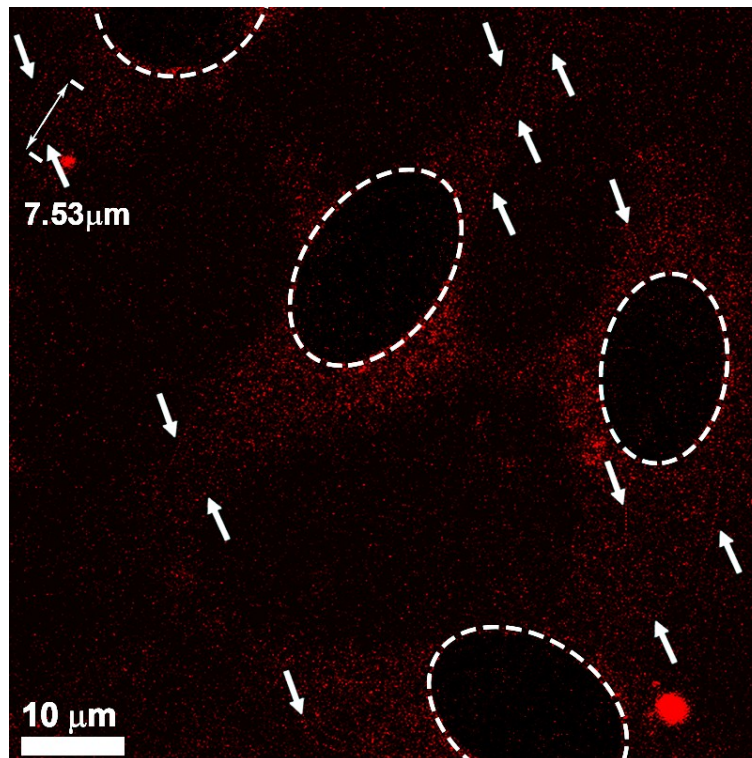

**Figure S18.** Confocal images of HepG2 cells incubated with the ZnP-OC-M NPs for 24 h. Elliptical region represents the nucleus and arrows refer to the self-assembled nanofibers in cells.

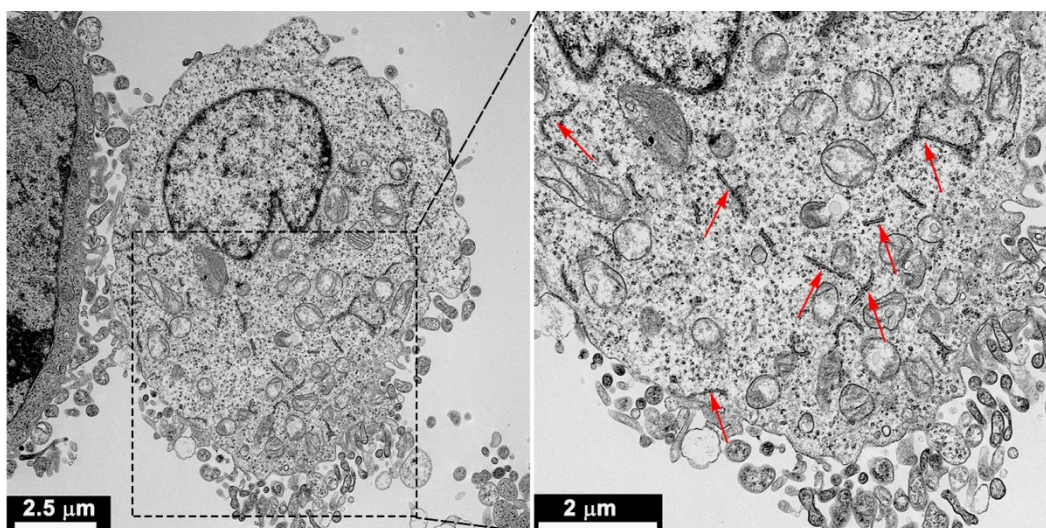

**Figure S19.** The bio-TEM images of HepG2 cells incubated with the ZnP-OC-M NPs for 2 h. The arrows refer to the self-assembled nanofibers in cells.

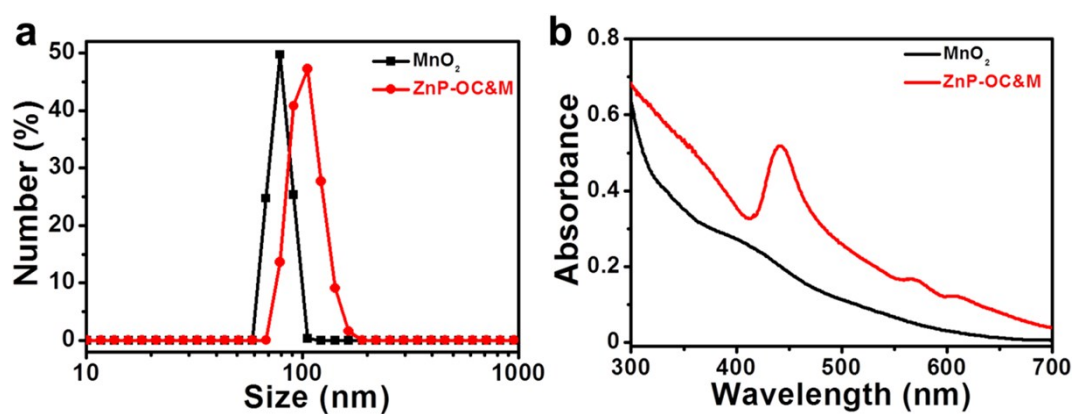

**Figure S20.** a) The size and b) Uv-vis spectrum of MnO<sub>2</sub> and ZnP-OC&M NPs. The concentration of ZnP-OC&M NPs is 0.3 mg/mL.

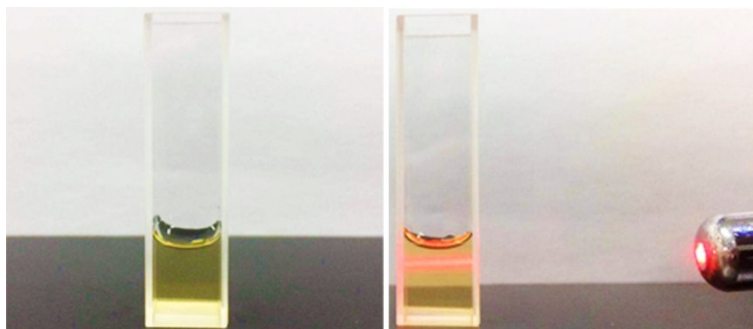

**Figure S21.** a) The a) water-dispersibility and b) morphology of ZnP-OC&M NPs.

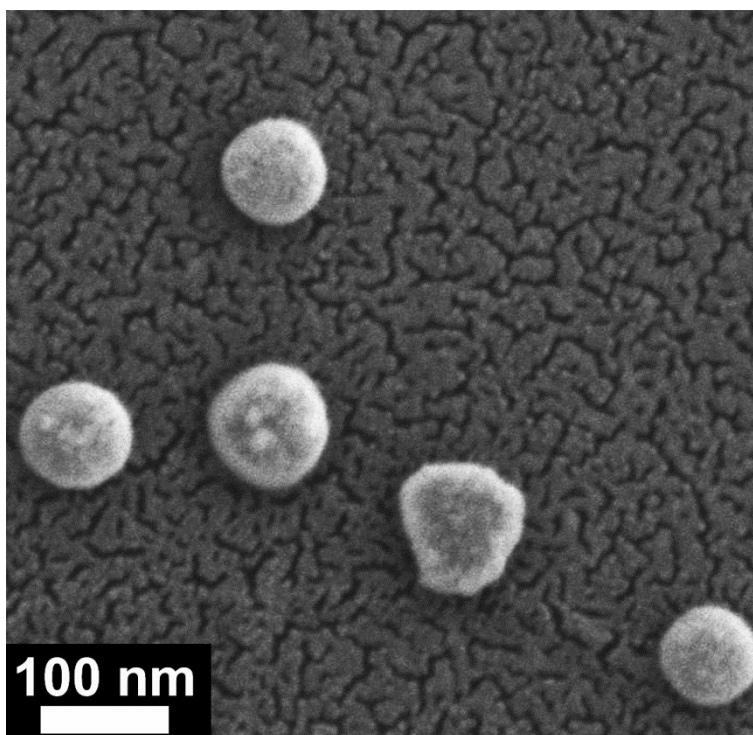

**Figure S22.** The SEM image of ZnP-OC&M NPs.

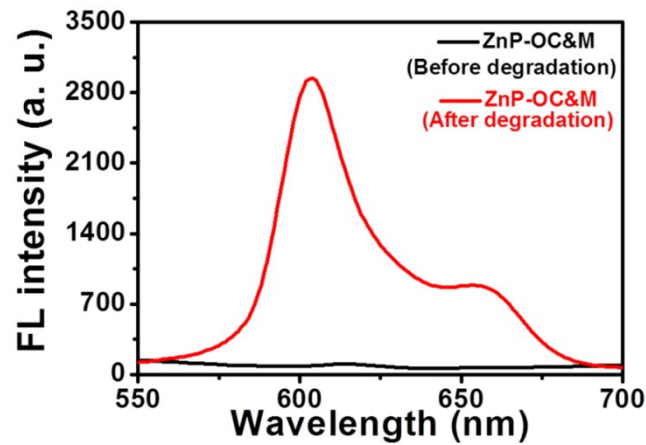

**Figure S23.** The changes of fluorescence spectrum of ZnP-OC&M NPs before and after degradation under pH = 5.5, 100  $\mu$ M H<sub>2</sub>O<sub>2</sub>.

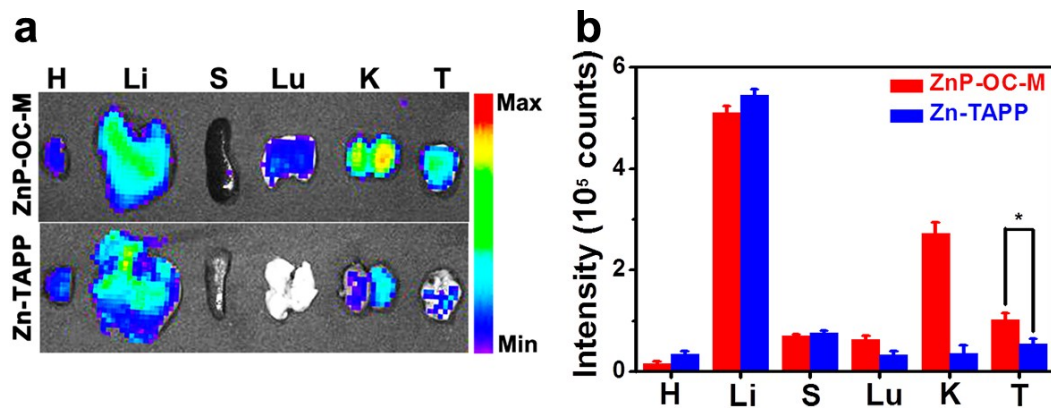

**Figure S24.** a) The fluorescence imaging and b) quantitative determination of fluorescence intensity of major organs (heart, liver, spleen, lung, kidney) and tumor after intravenous injection for 48 h.

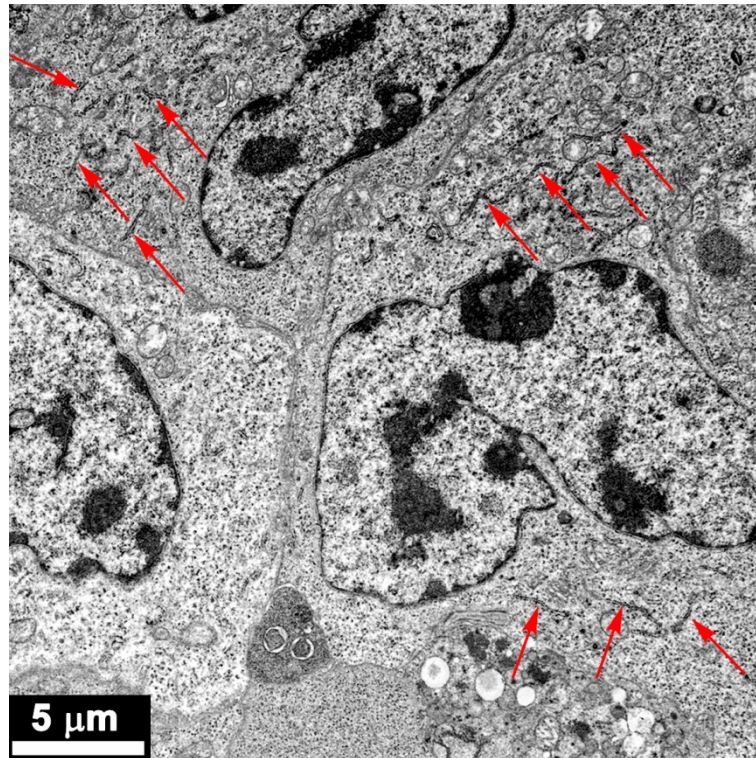

**Figure S25.** The bio-TEM images of tumor tissue with nanofibers after intravenous injection of ZnP-OC-M NPs. The arrows refer to the self-assembled nanofibers in tumor tissue.

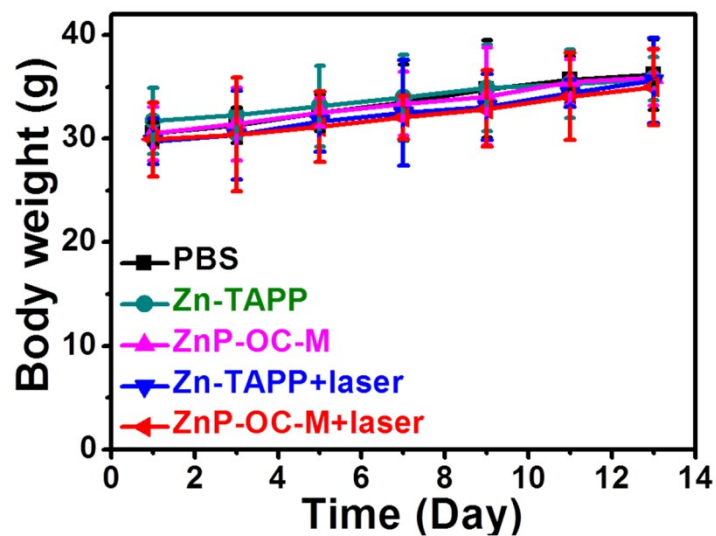

**Figure S26.** The body weight of the PBS, Zn-TAPP, ZnP-OC-M, Zn-TAPP + laser and ZnP-OC-M + laser groups of mice with different time.

## References

1. H. M. Wang, J. Q. Jiang, J. H. Xiao, R. L. Gao, F. Y. Lin, X. Y. Liu, *Chem. Biol. Interact.*, 2008, **172**, 154-158.
2. Y. Liu, Y. Zhang, X. Li, X. Gao, X. Niu, W. Wang, Q. Wu, Z. Yuan, *Nanoscale*, 2019, **11**, 10429-10438.
3. Hongmin Chen, Changbin Zhang, Hong He, *J. Phys. Chem. C*, 2007, **111**, 18033-18038.
4. J. Zhang, Y. L. Mu, Z. Y. Ma, K. Han, H. Y. Han, *Biomaterials*, 2018, **182**, 269-278.
